# Supplementary material for: Sex differences in campylobacteriosis incidence rates at different ages - a seven country, multi-year, meta-analysis. A potential mechanism for the infection
Source: Springer Nature journal article supplement (doi:10.1186/s12879-020-05351-6), 2020-08-25

Additional file, Appendix B

Figure B1, Asymmetry analysis

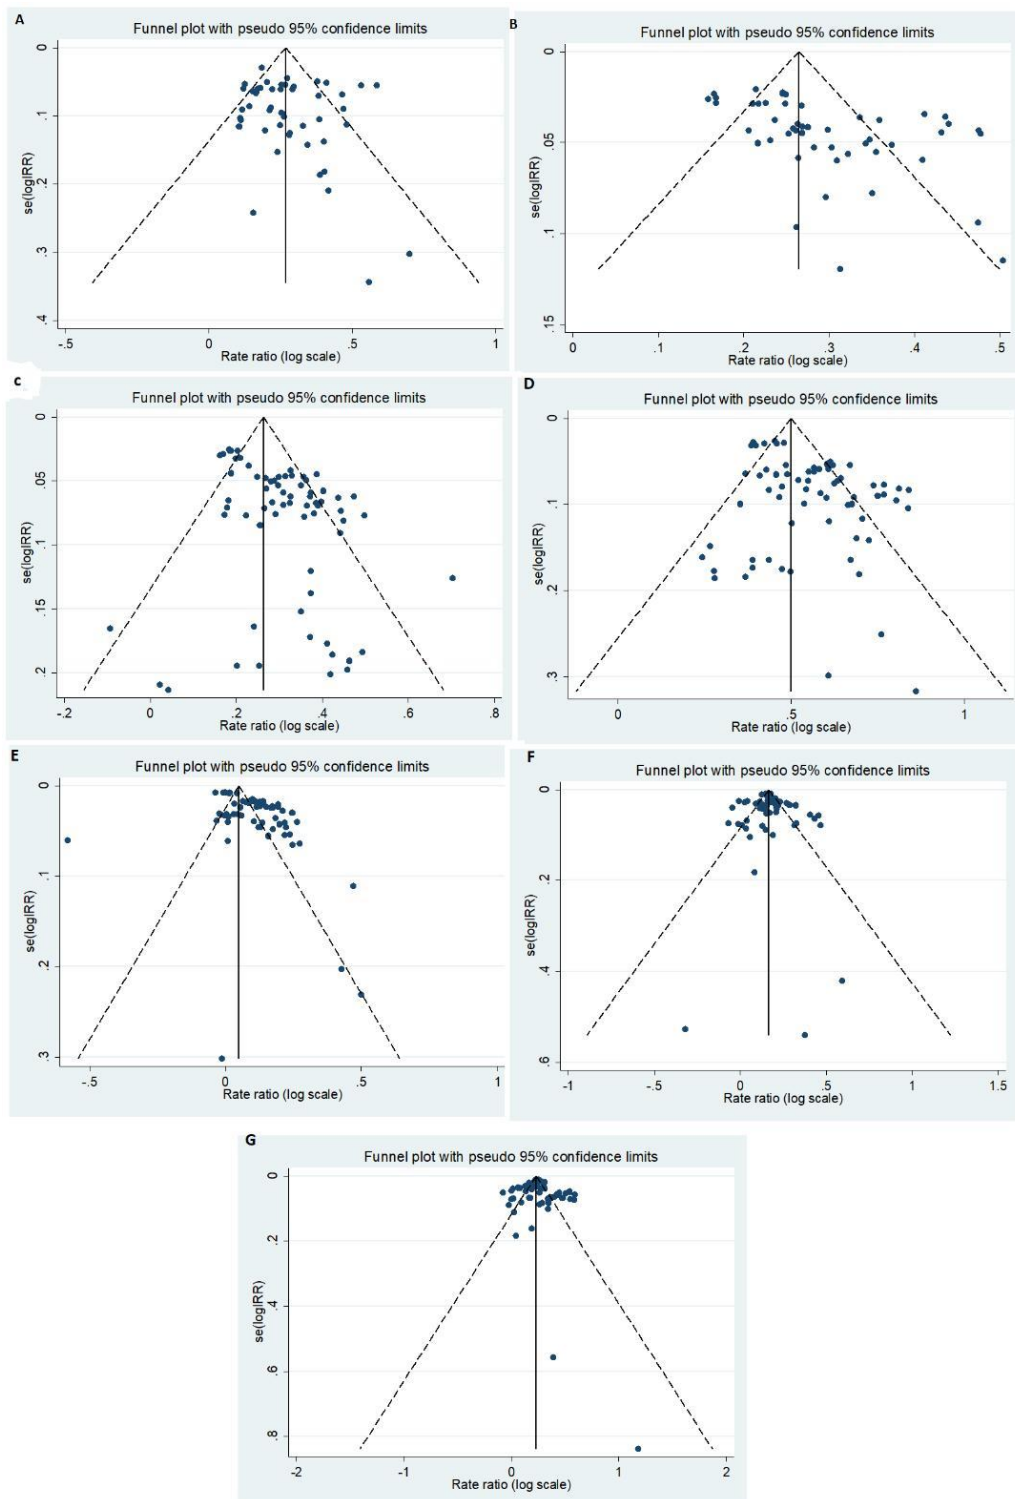

Supplement: MOESM2 [file 18313722]
